# Supplementary material for: Mechanistic insights into hydroxynaphthoic acid-based suppression of lignin repolymerization
Source: Royal Society of Chemistry journal article supplement (doi:10.1039/d5su00841g), 2026-04-13
Supplement: d5su00841g1.pdf [file d5su00841g1.pdf]

## Supporting Information

# Mechanistic Insights into Hydroxynaphthoic Acid-Based Suppression of Lignin Repolymerization

*Chenhao Li*<sup>†</sup>, *Matthias Alexander Ulrich Eckl*<sup>\*\*</sup>, *Pascal Fitz*<sup>\*\*</sup>, *Thomas Pielhop*<sup>\*\*</sup>, *Sergio Vernuccio*<sup>†‡\*</sup>

<sup>†</sup> School of Chemical, Materials and Biological Engineering, The University of Sheffield, Sheffield, United Kingdom.

<sup>‡</sup> School of Chemistry and Chemical Engineering, University of Southampton, Southampton, United Kingdom.

<sup>\*\*</sup> School of Life Sciences and Facility Management, Zurich University of Applied Sciences, Zurich, Switzerland.

\*Corresponding authors: Sergio Vernuccio ([s.vernuccio@soton.ac.uk](mailto:s.vernuccio@soton.ac.uk)), Thomas Pielhop

([thomas.pielhop@zhaw.ch](mailto:thomas.pielhop@zhaw.ch))

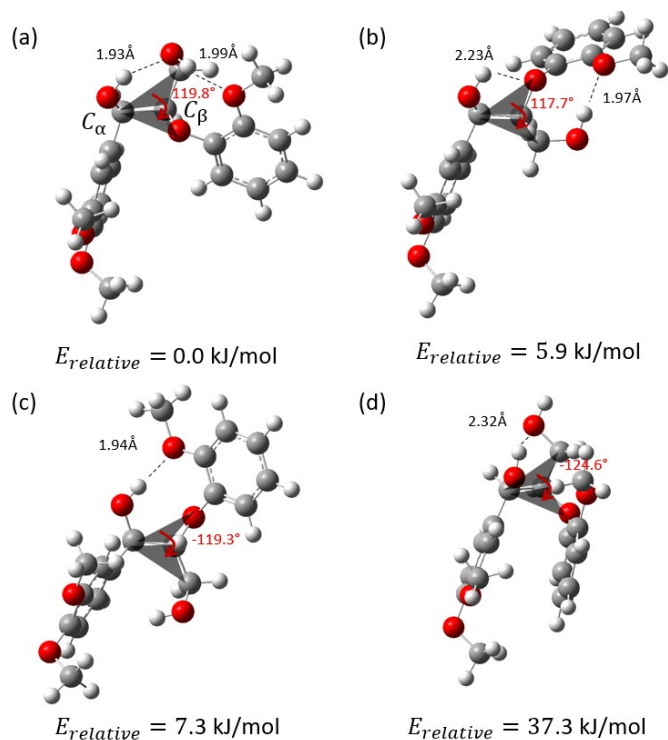

**Figure S1.** Different optimized configurations of VG. Grey, white and red atoms correspond to C, H, and O, respectively. The red numbers represent the dihedral angles C–C<sub>α</sub>–C<sub>β</sub>–O in degrees (°). The dashed lines represent the distance between pairs of atoms identified as the primary interaction sites in angstroms (Å). The numbers below each configuration represent the relative electronic energy ( $E_{relative}$ ).

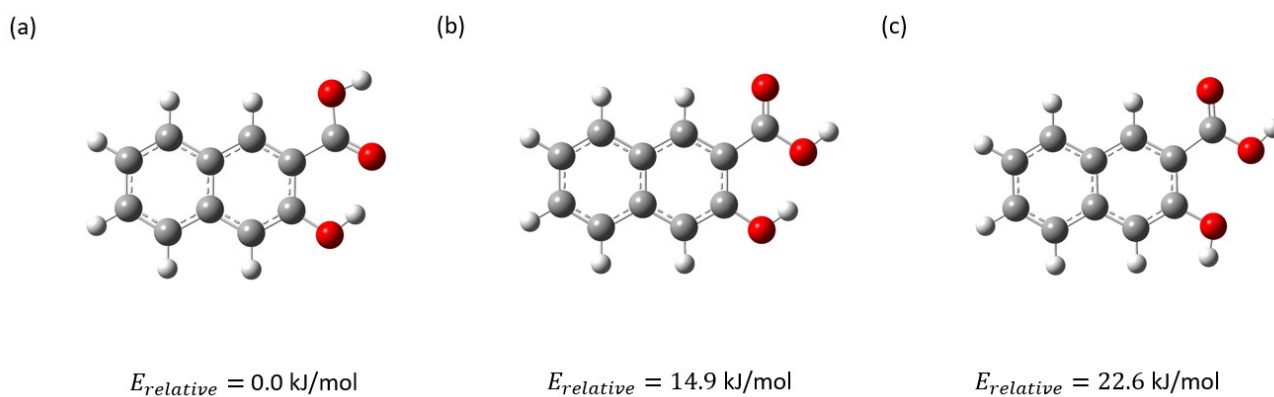

**Figure S2.** Different optimized configurations of a scavenger, illustrated for 3-hydroxy-2-naphthoic acid as an example. Grey, white and red atoms correspond to C, H and O, respectively. The numbers below each configuration represent the relative electronic energy ( $E_{relative}$ ).

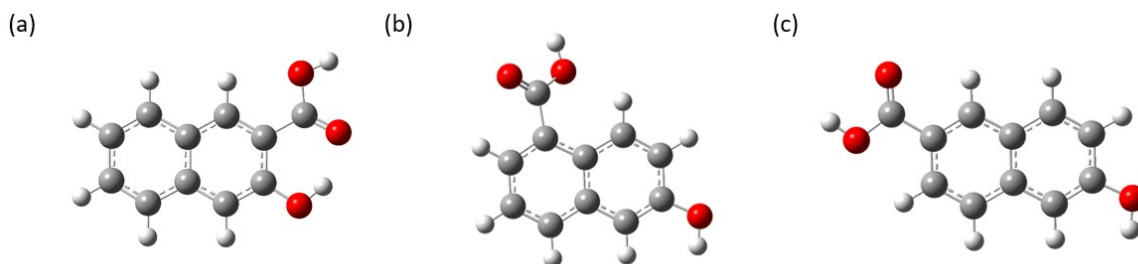

**Figure S3.** Constructed cluster models of selected cation scavengers (a) 3-hydroxy-2-naphthoic acid, (b) 6-hydroxy-1-naphthoic acid, and (c) 6-hydroxy-2-naphthoic acid. Grey, white and red atoms correspond to C, H and O, respectively.

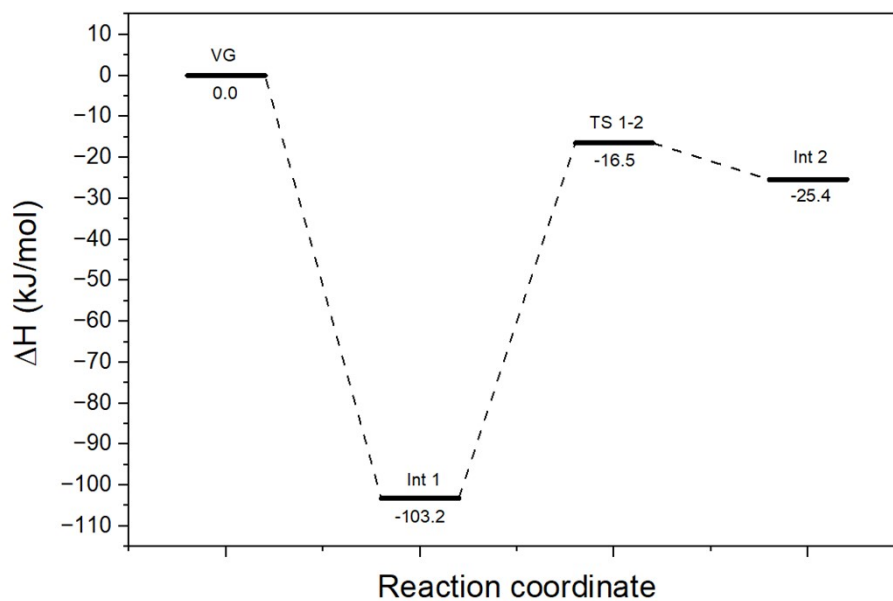

**Figure S4.** Reaction coordinate diagram showing the thermal enthalpy profiles for the acid-catalysed dehydration of VG.

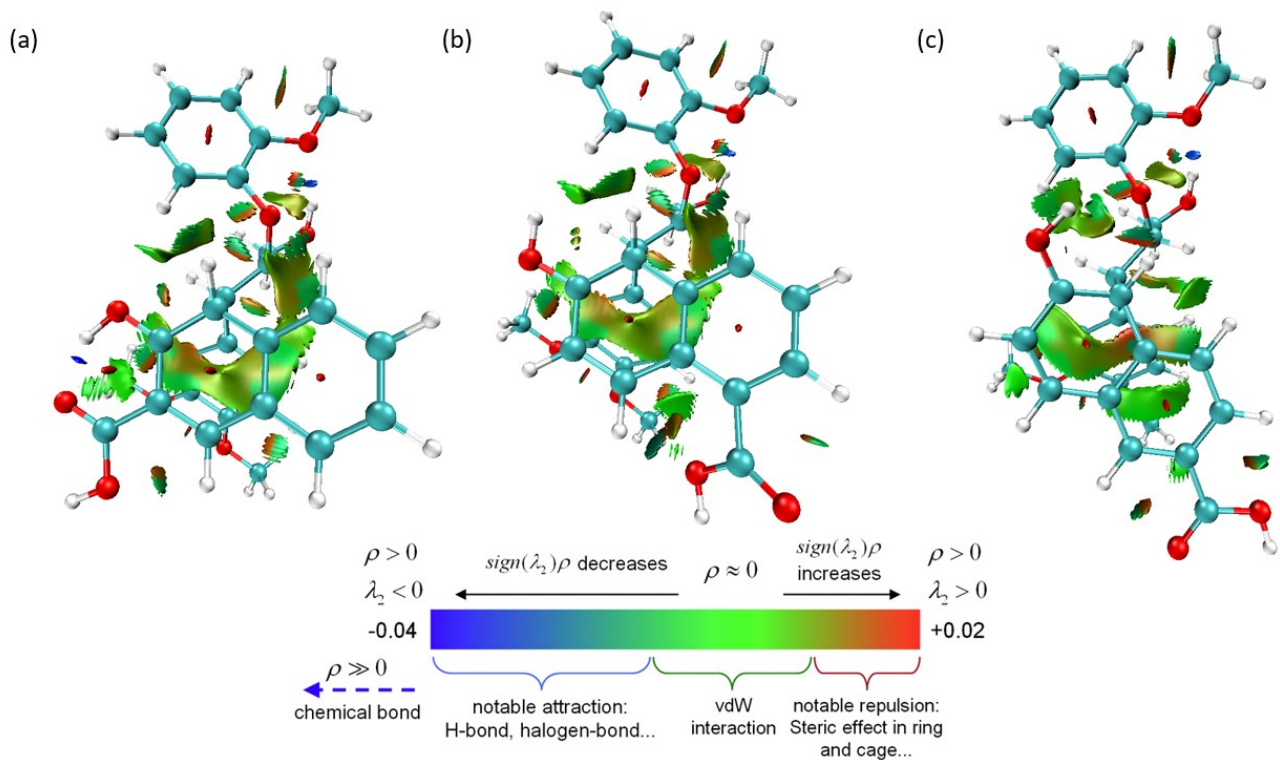

**Figure S5.** IRI calculations for *lignin*<sup>+</sup> binding with (a) 3-hydroxy-2-naphthoic acid, (b) 6-hydroxy-1-naphthoic acid and (c) 6-hydroxy-2-naphthoic acid at IRI = 1.0. Red, turquoise, white atoms correspond to O, C and H, respectively.  $\rho$  indicates the electron density,  $\text{sign}(\lambda_2)$  denotes the sign of the second largest eigenvalue of Hessian of  $\rho$ .

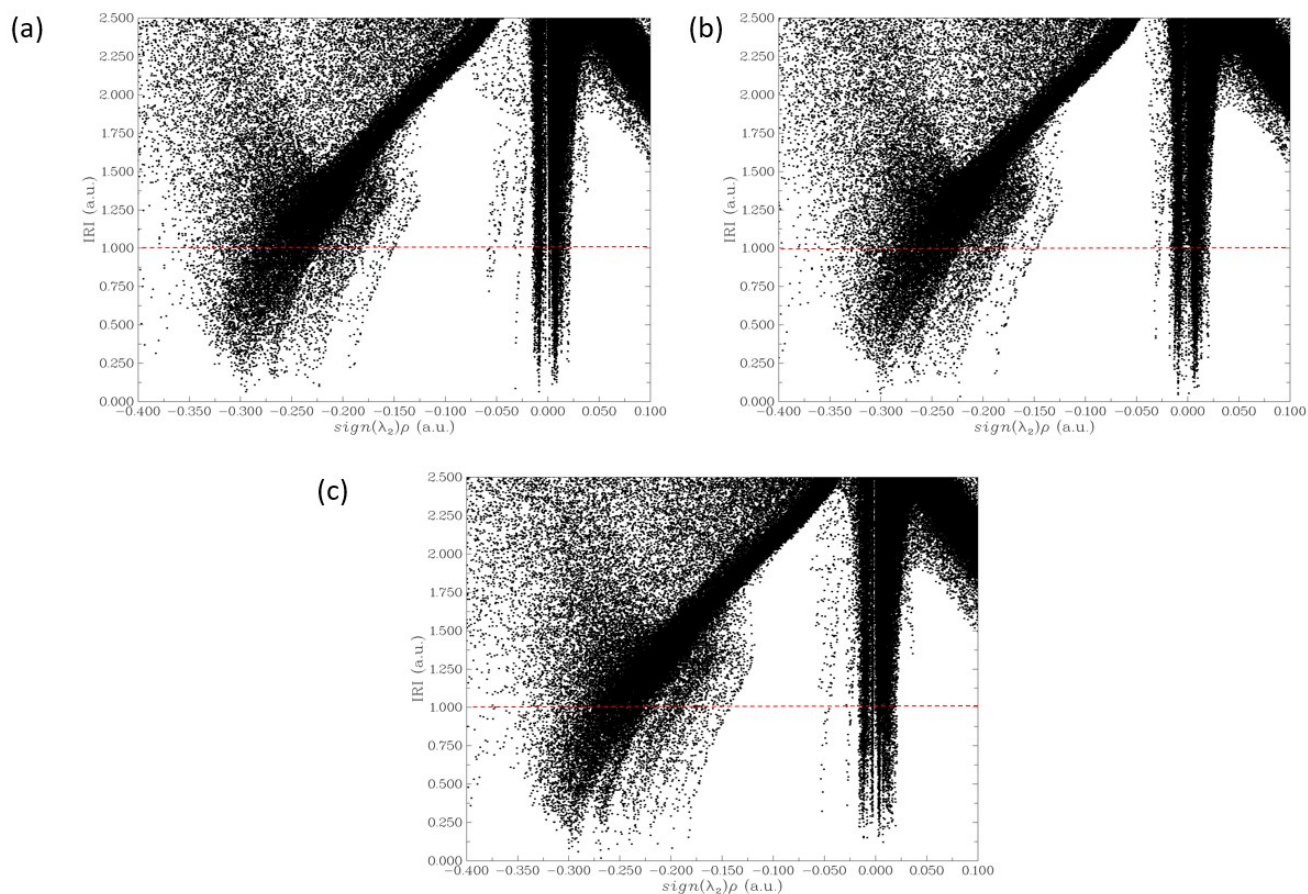

**Figure S6.** Scatter map of IRI vs  $\text{sign}(\lambda_2)\rho$  (-0.4 to 0.1) for *lignin*<sup>+</sup> binding with (a) 3-hydroxy-2-naphthoic acid, (b) 6-hydroxy-1-naphthoic acid and (c) 6-hydroxy-2-naphthoic acid. The points intersecting with the red dashed line (IRI = 1.0) correspond to the grid points constituting the isosurfaces shown in **Figure S1**.

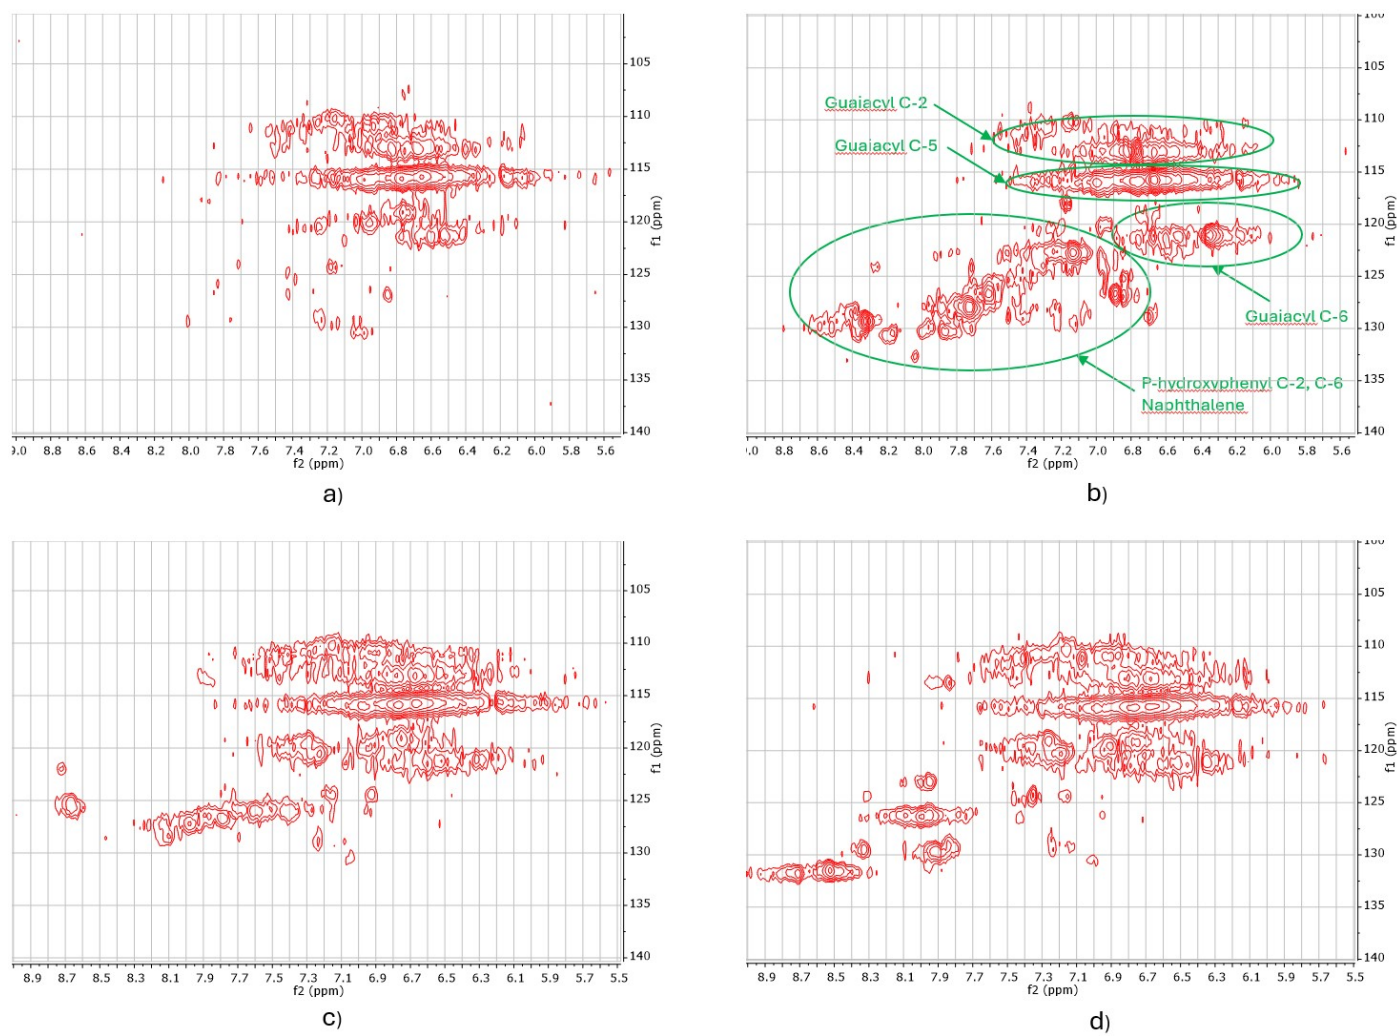

**Figure S7.** Aromatic region of the  $^{13}\text{C}$ - $^1\text{H}$  HSQC spectra of lignin isolated after pretreatment (a) without additive, (b) with 3-hydroxy-2-naphthoic acid, (c) with 6-hydroxy-1-naphthoic acid and (d) with 6-hydroxy-2-naphthoic acid. Characteristic signals are highlighted exemplarily for the 3-hydroxy-2-naphthoic acid sample.

**Table S1.** Calculated Gibbs free energy ( $\Delta G$ ) for the binding interaction of *lignin*<sup>+</sup>, various scavengers and lignin fragment.

| Scavengers                 | Binding Gibbs free energy between <i>lignin</i> <sup>+</sup> and scavengers or lignin fragment (kJ/mol) |
|----------------------------|---------------------------------------------------------------------------------------------------------|
| 3-Hydroxy-2-naphthoic acid | -16.8                                                                                                   |
| 6-Hydroxy-1-naphthoic acid | 4.0                                                                                                     |
| 6-Hydroxy-2-naphthoic acid | 21.7                                                                                                    |
| Lignin fragment            | 33.3                                                                                                    |

**Table S2.** Calculated enthalpy change ( $\Delta H$ ) associated with the binding interaction of *lignin*<sup>+</sup> with the investigated cation scavengers and water.

| Scavenger                  | Binding enthalpy between <i>lignin</i> <sup>+</sup> and scavenger (kJ/mol) | Binding enthalpy between <i>lignin</i> <sup>+</sup> + scavenger and water (kJ/mol) |
|----------------------------|----------------------------------------------------------------------------|------------------------------------------------------------------------------------|
| 3-Hydroxy-2-naphthoic acid | -89.6                                                                      | -13.4                                                                              |
| 6-Hydroxy-1-naphthoic acid | -59.3                                                                      | -13.4                                                                              |
| 6-Hydroxy-2-naphthoic acid | 21.7                                                                       | -13.7                                                                              |

**Table S3.** HPLC operating parameters for quantifying hydroxynaphthoic acids (3-hydroxy-2-naphthoic acid, 6-hydroxy-1-naphthoic acid, 6-hydroxy-2-naphthoic acid) and 2-naphthol.

| Device / parameter | Detail / value                                                                   |
|--------------------|----------------------------------------------------------------------------------|
| UHPLC system       | Shimadzu Nexera                                                                  |
| Column             | Nucleodur C8 Gravity, 150×4 mm, 3 μm, 110 Å (Macherey-Nagel #760658.40)          |
| Guard filter       | KrudKatcher Ultra in-line filter, 2 μm (Phenomenex #AF0-8497)                    |
| Detector (DAD)     | Model SPD-M30A, λ=230 nm                                                         |
| Eluent A           | Methanol                                                                         |
| Eluent B           | 0.1 % (v/v) H <sub>3</sub> PO <sub>4</sub> in H <sub>2</sub> O                   |
| Gradient           | 0–10 min: 90% → 40% B 10–16 min: 40% → 20% B 16–19 min: 20% → 90% B              |
| Flow rate          | 0–13 min: 0.80 mL min <sup>-1</sup> , > 13 min: 1.20 mL min <sup>-1</sup>        |
| Column temp.       | 35 °C                                                                            |
| Autosampler temp.  | 10 °C                                                                            |
| Injection volume   | 10 μL                                                                            |
| Calibration range  | 20–200 mg L <sup>-1</sup> , quadratic fit through origin, r <sup>2</sup> > 0.999 |
| Retention times    | 3H2NA 13.55 min, 6H1NA 10.60 min, 6H2NA 10.80 min, 2N 12.45 min                  |

**Table S4.** Compositional analysis of the biomass after pretreatment (210 °C, 2 h) without additive (control) and with carbocation scavengers. Hemicellulose is indicated as mannan. AIL: acid-insoluble lignin, ASL: acid-soluble lignin.

| Scavenger                  | Mannan (%)    | Glucan (%)     | AIL (%)      | ASL (%)       |
|----------------------------|---------------|----------------|--------------|---------------|
| - (control)                | 0.70% ± 0.07% | 49.45% ± 1.13  | 48.0% ± 1.4% | 3.1% ± 0.25%  |
| 3-Hydroxy-2-naphthoic acid | 0.45% ± 0.05% | 37.63% ± 0.26% | 58.8% ± 1.4% | 3.3% ± 0.07%  |
| 6-Hydroxy-1-naphthoic acid | 0.84% ± 0.00% | 48.67% ± 1.07% | 48.8% ± 2.2% | 7.62% ± 0.16% |
| 6-Hydroxy-2-naphthoic acid | 0.74% ± 0.03% | 47.12% ± 0.90% | 48.1% ± 1.5% | 8.07% ± 0.22% |

**Table S5.** Lignin yields in the extraction of lignin-rich residues with DMSO-d<sub>6</sub>. Lignin-rich residues were prepared from biomass after pretreatment (210 °C, 2 h) without additive (control) and with carbocation scavengers, by enzymatic cellulose saccharification and ball-milling. Yields refer to the initial lignin content (AIL + ASL) of the residues.

| Scavenger                  | Extraction yield |
|----------------------------|------------------|
| - (control)                | 55.3%            |
| 3-Hydroxy-2-naphthoic acid | 81.6%            |
| 6-Hydroxy-1-naphthoic acid | 90.4%            |
| 6-Hydroxy-2-naphthoic acid | 87.6%            |

**Table S6.** SEC characterization of the lignins after pretreatment without additive (control) and after pretreatment with carbocation scavengers. Shown are weight average molecular weight (Mw), number average molecular weight (Mn), and polydispersity index (PDI).

| Scavenger                  | Mw     | Mn    | PDI  |
|----------------------------|--------|-------|------|
| - (control)                | 198259 | 52176 | 3.80 |
| 3-Hydroxy-2-naphthoic acid | 33848  | 16137 | 2.10 |
| 6-Hydroxy-1-naphthoic acid | 25071  | 12786 | 1.96 |
| 6-Hydroxy-2-naphthoic acid | 24067  | 11589 | 2.08 |
